# Supplementary material for: Designing a ferrimagnetic-ferroelastic multiferroic semiconductor in FeMoClO4 nanosheets via element substitution
Source: Royal Society of Chemistry journal article supplement (doi:10.1039/d2nr05277f), 2022-01-01
Supplement: d2nr05277f1.pdf [file d2nr05277f1.pdf]

## Supporting Information

# Designing Ferrimagnetic-Ferroelastic Multiferroic Semiconductor in FeMoClO<sub>4</sub> Nanosheet via Element Substitution

Lijuan Yan,<sup>a</sup> Xiaofeng Liu,<sup>b,c,d</sup> Pengfei Gao,<sup>e</sup> Xiangyang Li,<sup>\*b</sup> and Xingxing Li<sup>\*b,c</sup>

<sup>a</sup>College of Electronics & Information Engineering, Guangdong Ocean University, Zhanjian, Guangdong 524088, China

<sup>b</sup>Hefei National Research Center for Physical Sciences at the Microscale, University of Science and Technology of China, Hefei, Anhui 230026, China

<sup>c</sup>Department of Chemical Physics, University of Science and Technology of China, Hefei, Anhui 230026, China

<sup>d</sup>School of Physics, Hefei University of Technology, Hefei, Anhui 230009, China

<sup>e</sup>Interdisciplinary Center for Fundamental and Frontier Sciences, Nanjing University of Science and Technology, Jiangyin, Jiangsu 214443, China

\*E-mail: xyangli@ustc.edu.cn

\*E-mail: lixx@ustc.edu.cn

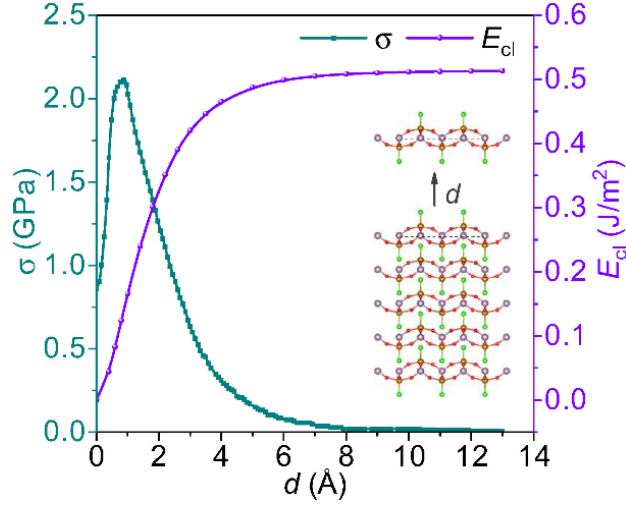

**Figure S1.** Exfoliation energy  $E_{cl}$  and cleavage strength  $\sigma$  as functions of separation distance  $d$  in the process of exfoliating one nanosheet from its bulk crystal.

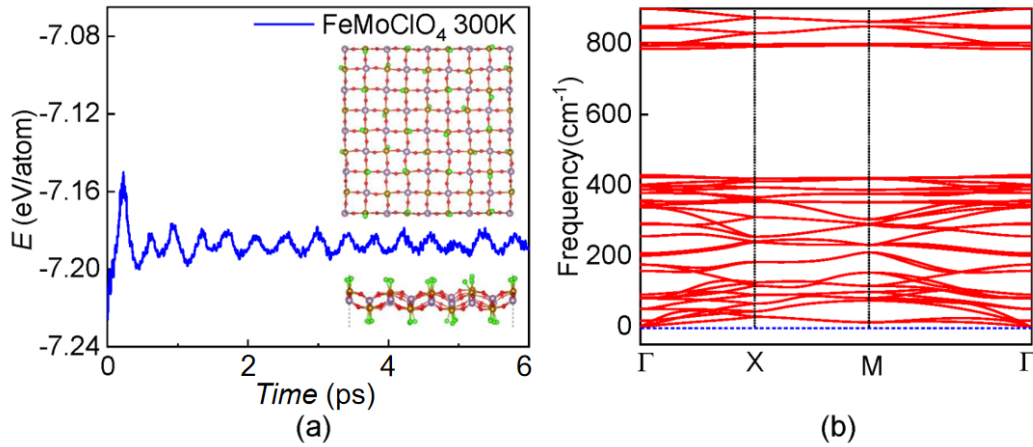

**Figure S2.** (a) *Ab initio* molecular dynamics (AIMD) simulation of total energy with time for  $\text{FeMoClO}_4$  with a  $P4/nmm$  space group at 300 K. The insets depict snapshots of  $4 \times 4 \times 1$  supercell containing 224 atoms after 6 ps. (b) Phonon dispersions of the  $\text{FeMoClO}_4$  nanosheet.

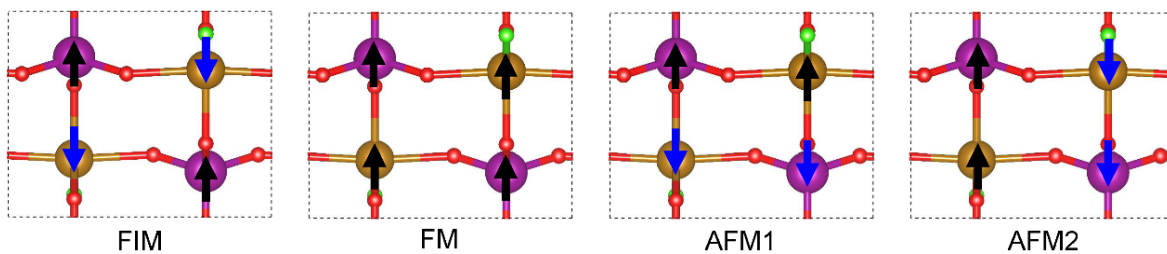

**Figure S3.** Four different magnetic states calculated for FeMnClO<sub>4</sub> nanosheet. They contain one ferrimagnetic (FIM) state, one ferromagnetic (FM) state, and two antiferromagnetic (AFM) states.

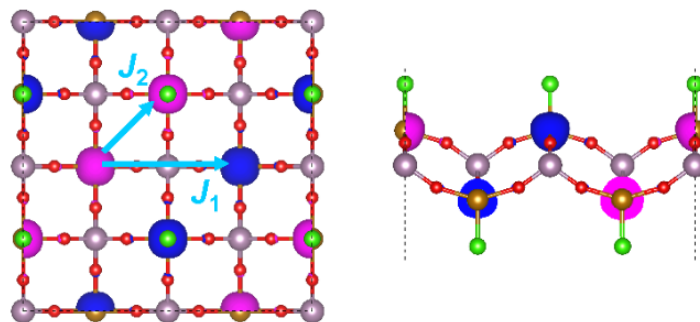

**Figure S4.** Spin density, nearest and next-nearest spin exchange ( $J_1$  and  $J_2$ ) paths for the FeMoClO<sub>4</sub> nanosheet. Pink (Blue) denotes spin-up (spin-down) component.

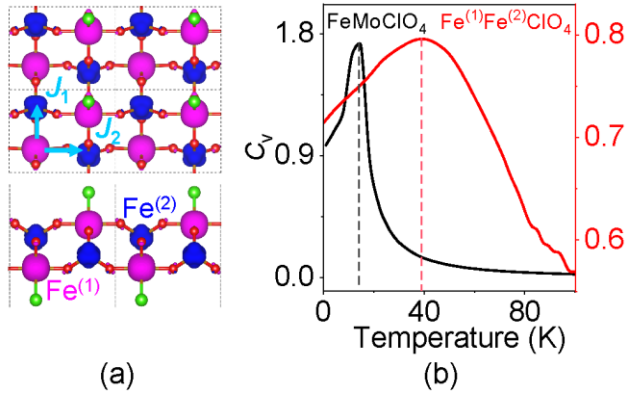

**Figure S5.** (a) Spin density, nearest and next-nearest spin exchange ( $J_1$  and  $J_2$ ) paths for 2D  $\text{Fe}^{(1)}\text{Fe}^{(2)}\text{ClO}_4$ . Pink (Blue) denotes spin-up (spin-down) component. The specific values of spin exchange parameters are shown in Table S4. After  $\text{Fe}^{(2)6+}$  replaces  $\text{Mo}^{6+}$ , the calculated magnetic moment of  $\text{Fe}^{(1)}\text{Fe}^{(2)}\text{ClO}_4$  is  $6 \mu_B$  per unit cell, which is  $2 \mu_B$  per unit cell lower than that of  $\text{FeMnClO}_4$ . Noted that among the entire 3d transition metals,  $\text{Mo}^{6+}$  can be substituted by  $\text{Cr}^{6+}$  besides  $\text{Fe}^{6+}$  and  $\text{Mn}^{6+}$ , but  $\text{FeCrClO}_4$  has an AFM ground state as well as  $\text{FeMoClO}_4$ . Other transition metals that can not possess a +6 charge state are discarded. (b) Specific heat ( $C_v$ ) as a function of temperature for  $\text{FeMoClO}_4$  and  $\text{Fe}^{(1)}\text{Fe}^{(2)}\text{ClO}_4$ . The calculated Curie temperature ( $T_c = 39 \text{ K}$ ) of  $\text{Fe}^{(1)}\text{Fe}^{(2)}\text{ClO}_4$  is higher than  $14 \text{ K}$  of  $\text{FeMoClO}_4$ , but lower than  $127 \text{ K}$  of  $\text{FeMnClO}_4$ .

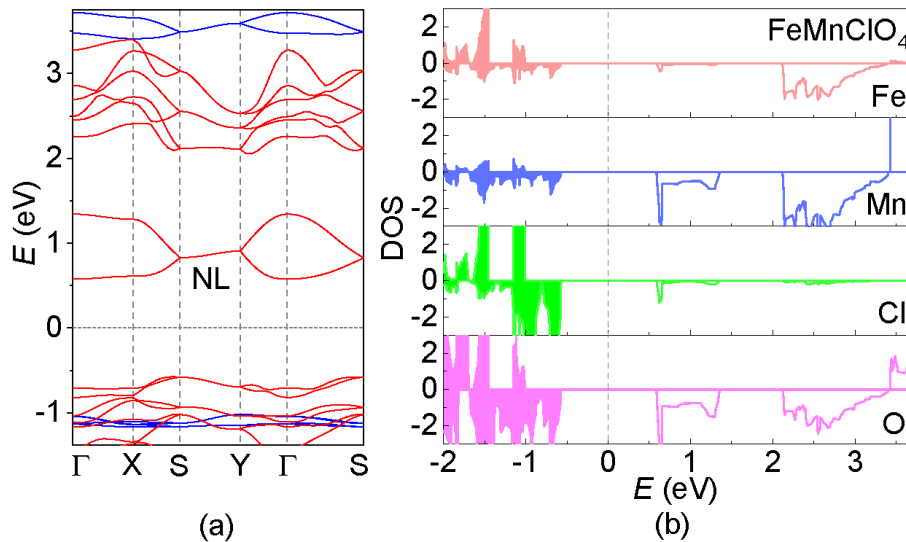

**Figure S6.** (a) Spin-polarized band structure and (b) projected density of states for the  $\text{FeMnClO}_4$  nanosheet calculated by HSE06 functional.

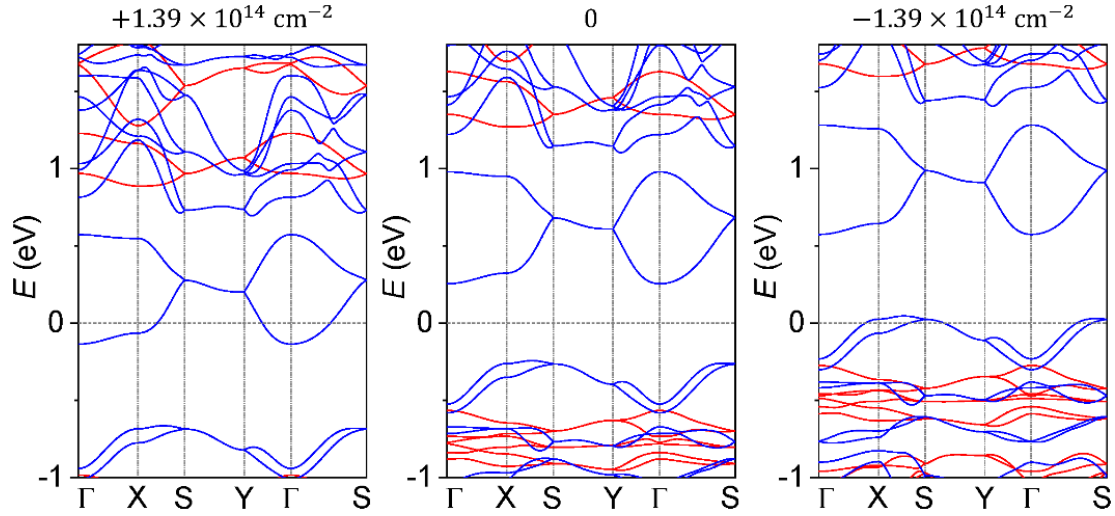

**Figure S7.** Band structure of FeMnClO<sub>4</sub> nanosheet for electron doping (left), pure (middle) and hole doping (right) with a carrier concentration of  $\pm 1.39 \times 10^{14} \text{ cm}^{-2}$ . Positive and negative values above the panel represent electron and hole doping, respectively.

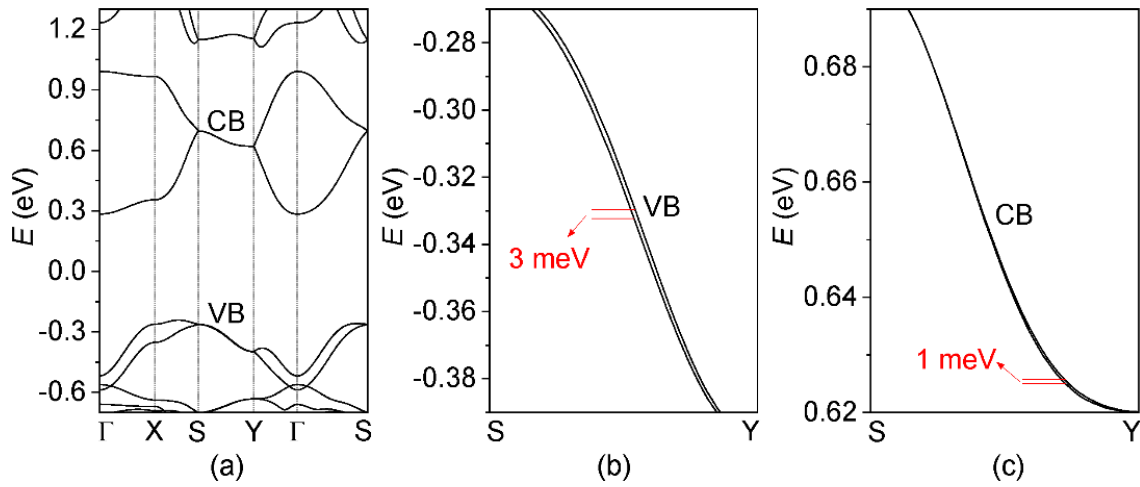

**Figure S8.** (a) Band structure of FeMnClO<sub>4</sub> nanosheet after considering the spin orbit coupling effect. (b, c) Topological nodal lines in valence band (VB) and conduction band (CB).

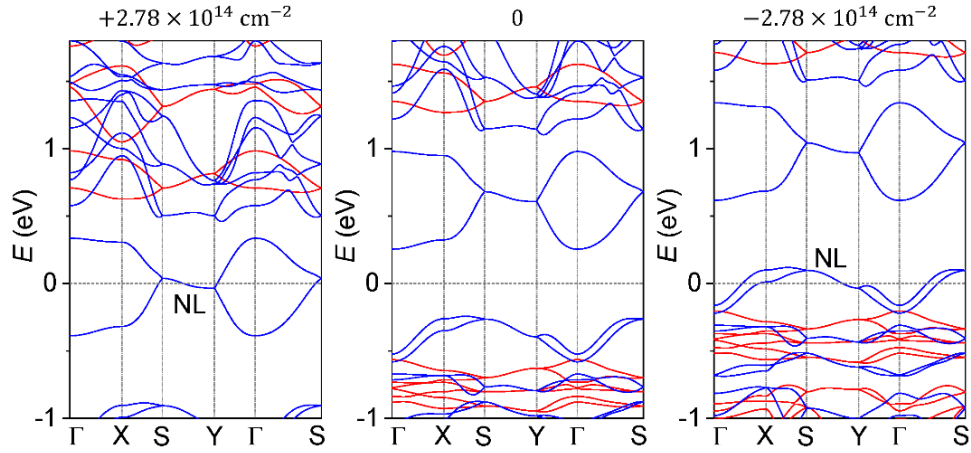

**Figure S9.** Band structure of FeMnClO<sub>4</sub> nanosheet for electron doping (left), pure (middle) and hole doping (right) with a carrier concentration of  $2.78 \times 10^{14} \text{ cm}^{-2}$ . Positive and negative values above the panel represent electron and hole doping, respectively.

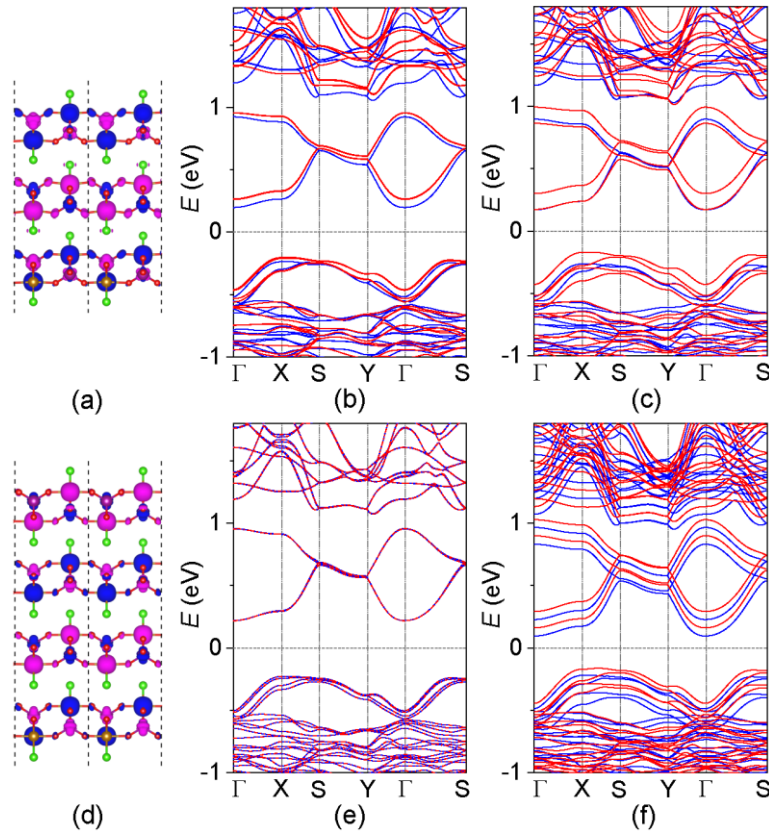

**Figure S10.** (a, d) Spin densities and (b, c, e, f) band structures of trilayer and four-layer FeMnClO<sub>4</sub>, where the band structures in (c, f) panels are plotted under a perpendicular electric field of 0.01 V/Å.

**Table S1.** Calculated relative energies of ferromagnetic (FM) state to ferrimagnetic (FIM) state  $\Delta E$  (eV per chemical formula) for  $\text{FeMnClO}_4$  at different values of onsite Coulomb interaction  $U$ .

| $\Delta E$ ( $\text{FeMnClO}_4$ ) | $U_{\text{Mn}=2}$ | $U_{\text{Mn}=3}$ | $U_{\text{Mn}=4}$ | $U_{\text{Mn}=5}$ | $U_{\text{Mn}=6}$ |
|-----------------------------------|-------------------|-------------------|-------------------|-------------------|-------------------|
| $U_{\text{Fe}=2}$                 | 0.726             | 0.677             | 0.607             | 0.512             | 0.376             |
| $U_{\text{Fe}=3}$                 | 0.696             | 0.656             | 0.588             | 0.495             | 0.394             |
| $U_{\text{Fe}=4}$                 | 0.659             | 0.627             | 0.556             | 0.474             | 0.387             |
| $U_{\text{Fe}=5}$                 | 0.621             | 0.593             | 0.523             | 0.451             | 0.374             |
| $U_{\text{Fe}=6}$                 | 0.581             | 0.552             | 0.488             | 0.424             | 0.357             |

**Table S2.** Magnetic exchange parameters (in meV), magnetic anisotropy energies (meV per chemical formula), and axial (planar) anisotropy strength (meV) for the  $\text{FeMoClO}_4$  nanosheet.

| $\text{FeMoClO}_4$ | $J_1$ | $J_2$ | $E_{[010]}-E_{[100]}$ | $E_{[001]}-E_{[100]}$ | $D_{\text{Fe}}$ | $E_{\text{Fe}}$ |
|--------------------|-------|-------|-----------------------|-----------------------|-----------------|-----------------|
|                    | 0.23  | 0.14  | 0                     | 1.32                  | 0.21            | 0.00            |

**Table S3.** Magnetic exchange parameters (in meV), magnetic anisotropy energies (meV per chemical formula), and axial (planar) anisotropy strength (meV) for the  $\text{FeMnClO}_4$  nanosheet.

| $\text{FeMnClO}_4$ | $J_1$ | $J_2$ | $E_{[010]}-E_{[100]}$ | $E_{[001]}-E_{[100]}$ | $D_{\text{Fe}}$ | $E_{\text{Fe}}$ | $D_{\text{Mn}}$ | $E_{\text{Mn}}$ |
|--------------------|-------|-------|-----------------------|-----------------------|-----------------|-----------------|-----------------|-----------------|
|                    | 45.77 | 13.00 | 0.61                  | 1.31                  | 0.13            | 0.03            | 0.38            | 0.59            |

**Table S4.** Magnetic exchange parameters (in meV), magnetic anisotropy energies (meV per chemical formula), and axial (planar) anisotropy strength (meV) for the  $\text{Fe}^{(1)}\text{Fe}^{(2)}\text{ClO}_4$  nanosheet.

| $\text{Fe}^{(1)}\text{Fe}^{(2)}\text{ClO}_4$ | $J_1$ | $J_2$ | $E_{[010]}-E_{[100]}$ | $E_{[001]}-E_{[100]}$ | $D_{\text{Fe}(1)}$ | $E_{\text{Fe}(1)}$ | $D_{\text{Fe}(2)}$ | $E_{\text{Fe}(2)}$ |
|----------------------------------------------|-------|-------|-----------------------|-----------------------|--------------------|--------------------|--------------------|--------------------|
|                                              | 18.47 | 1.98  | 0.48                  | 1.21                  | 0.10               | 0.01               | -0.14              | 0.06               |
